# Supplementary material for: Orthotopic Transplantation of the Full-length Porcine Intestine After Normothermic Machine Perfusion
Source: PubMed Central journal article supplement — Transplant Direct. 2022 Oct 24;8(11):e1390. doi: 10.1097/TXD.0000000000001390 (PMC9592306; doi:10.1097/txd.0000000000001390), 2022-10-24
Supplement: txd-8-e1390-s001.pdf [file txd-8-e1390-s001.pdf]

## **VIDEO LEGENDS**

### **Video S1. Intestinal peristalsis during normothermic machine perfusion.**

During 6-hour normothermic machine perfusion, the intestine demonstrated what appeared to be normal forward, synchronized intestinal motility.

**Video S2. Intestinal effluent production.** During 6-hour normothermic machine perfusion, production of apparently normal luminal effluent was observed that was progressively moved aboral and collected via ileal cannulation.

## TABLES

**Table S1.** Histology scoring for assessment of injury in intestine allografts.

| <b>Small bowel:<br/>feature</b>        | <b>Definition</b>                                                                                               |
|----------------------------------------|-----------------------------------------------------------------------------------------------------------------|
| <b><i>Architecture</i></b>             |                                                                                                                 |
| Villus blunting/atrophy                | Villous to crypt ratio <3:2                                                                                     |
| Crypt regeneration                     | Increased crypt mitotic activity                                                                                |
| Crypt dilatation/injury                | Atrophic, attenuated or markedly injured by inflammation                                                        |
| Gruenhagen's space                     | Lifting off of the superficial epithelium from the villi                                                        |
| Surface erosion/denuded villi          | Complete loss of epithelium with lamina propria damage and associated response (eg, inflammatory or hemorrhage) |
| Ulceration                             | Loss of epithelium with significant damage of the lamina propria leading to the formation of granulation tissue |
| Necrosis                               | Devitalized epithelium or muscle (eg, paleness, loss of nuclei, loss of cellular integrity)                     |
| Lamina propria inflammation            | Expansion of the lamina propria by inflammation                                                                 |
| Edema                                  | Excess fluid accumulation within the lamina propria or submucosa                                                |
| Paucity of intraepithelial lymphocytes | Decreased number of intraepithelial lymphocytes (<16/100 enterocytes) within the villi                          |
| <b><i>Epithelial cytology</i></b>      |                                                                                                                 |
| Vacuolization                          | Microvesicular cytoplasmic inclusions                                                                           |
| Loss of microvillus brush border       | Superficial epithelium lacks the terminal bar and brush border                                                  |
| Attenuation (from columnar)            | A loss of mucin leads to increased nuclear to cytoplasmic ratio                                                 |
| Re-epithelialization (surface)         | Within an area of injury immature epithelium appears                                                            |
| Lymphocytic infiltration               | Intraepithelial lymphocytes within the crypts                                                                   |
| Neutrophilic infiltration              | Intraepithelial neutrophils within the crypts                                                                   |

Qualitative scoring: 0 (normal), 1 (focal and mild), 2 (diffuse and mild), 3 (diffuse and moderate), and 4 (diffuse and severe).

**Table S2.** Pigs transplanted with NMP-stored intestinal allografts.

|      |                | Intraoperative                        | Postoperative  |                 |                   |                          |                  |                |                 |                   |                          |                  |                                                                       |
|------|----------------|---------------------------------------|----------------|-----------------|-------------------|--------------------------|------------------|----------------|-----------------|-------------------|--------------------------|------------------|-----------------------------------------------------------------------|
|      |                | 1 hour reperfusion                    | 24-hour values |                 |                   |                          |                  | 48-hour values |                 |                   |                          |                  |                                                                       |
| Pig  | NMP generation | Serosal appearance                    | HR, bpm        | Lactate, mmol/L | Attitude, QAR/BAR | Feces production, yes/no | Appetite, yes/no | HR, bpm        | Lactate, mmol/L | Attitude, QAR/BAR | Feces production, yes/no | Appetite, yes/no | Outcome postmortem                                                    |
| P248 | Gen2           | Jejunum: normal<br>Ileum:             | 80             | 0.6             | QAR               | No                       | Yes              | 100            | 1.2             | BAR               | Yes                      | Yes              | Healthy intestine                                                     |
| P253 | Gen3           | Jejunum and ileum: normal             | 132            | 0.5             | BAR               | No                       | Yes              | 140            | 0.6             | BAR               | No                       | Yes              | Healthy intestine                                                     |
| P267 | Gen3           | Jejunum and ileum: normal             | 90             | 0.8             | BAR               | No                       | No               | 100            | 1.5             | BAR               | No                       | No               | CMA and CMV thrombosis and mesenteric rent causing jejunal entrapment |
| P287 | Gen3           | Jejunum: normal<br>Ileum: darker pink | 140            | 1.0             | QAR               | No                       | No               | 160            | 1.1             | BAR               | Yes                      | No               | CMA and CMV thrombosis, ischemic intestine                            |
| P291 | Gen3           | Jejunum and ileum: normal             | 90             | 0.8             | BAR               | Yes                      | Yes              | 100            | 0.6             | BAR               | Yes                      | Yes              | Healthy intestine                                                     |

Significant intraoperative and postoperative results, diagnostic values, and outcomes from Gen2 (n = 1) and Gen3 (n = 4) recipient pigs. Intraoperatively, after 1 hour of graft reperfusion, the serosal appearance of the jejunum and ileum was assessed, and any section that appeared unhealthy was resected. Physical examination results and diagnostic values are reported 24 and 48 hours postoperatively in addition to recipient outcome at 48 hours.

BAR, bright, alert, and responsive; bpm, beats per minute; CMA, cranial mesenteric artery; CMV, cranial mesenteric vein; Gen2, generation 2 perfusion protocol; Gen3, generation 3 perfusion protocol; HR, heart rate; NMP, normothermic machine perfusion; QAR, quiet, alert, and responsive.
